# Supplementary material for: A meet-up of acetyl phosphate and c-di-GMP modulates BldD activity for development and antibiotic production
Source: PubMed Central journal article supplement — Nucleic Acids Res. 2023 Jun 7;51(13):6870–82. doi: 10.1093/nar/gkad494 (PMC10359459; doi:10.1093/nar/gkad494), 2023-06-07
Supplement: gkad494_supplemental_file.pdf [file gkad494_supplemental_file.pdf]

Supplementary Material:

**A meet-up of acetyl phosphate and c-di-GMP modulates BldD activity for development and antibiotic production**

Yu Fu<sup>1</sup>, Yu-Qi Dong<sup>1</sup>, Jin-Long Shen<sup>1</sup>, Bin-Cheng Yin<sup>1</sup>, Bang-Ce Ye<sup>1,2\*</sup>, Di You<sup>1\*</sup>

<sup>1</sup>Laboratory of Biosystems and Microanalysis, State Key Laboratory of Bioreactor Engineering, East China University of Science and Technology, Shanghai 200237, China;

<sup>2</sup>Institute of Engineering Biology and Health, Collaborative Innovation Center of Yangtze River Delta Region Green Pharmaceuticals, College of Pharmaceutical Sciences, Zhejiang University of Technology, Hangzhou 310014, Zhejiang, China.

\* Corresponding author

**Corresponding authors**

Bang-Ce Ye

Professor, Lab of Biosystems and Microanalysis,  
State Key Laboratory of Bioreactor Engineering,  
East China University of Science and Technology, Shanghai 200237, China  
Tel/Fax: 0086-21-64252094

Email: [bcye@ecust.edu.cn](mailto:bcye@ecust.edu.cn)

Di You

Associate Professor, Lab of Biosystems and Microanalysis,  
State Key Laboratory of Bioreactor Engineering,  
East China University of Science and Technology, Shanghai 200237, China  
Tel/Fax: 0086-21-64253832

Email: [030111115@mail.ecust.edu.cn](mailto:030111115@mail.ecust.edu.cn)

**Table S1 Secondary structural elements in BldD**

| Protein              | Helix (%) | Antiparallel (%) | Parallel (%) | $\beta$ -turn (%) | Random coil (%) | Total sum (%) |
|----------------------|-----------|------------------|--------------|-------------------|-----------------|---------------|
| BldD                 | 44.3      | 6.1              | 6.5          | 15.2              | 25.9            | 98.0          |
| BldD <sup>AcuA</sup> | 61.8      | 3.5              | 4.0          | 12.7              | 17.6            | 99.5          |
| BldD <sup>AcP</sup>  | 82.0      | 1.5              | 1.8          | 9.8               | 8.9             | 104.0         |

**Table S2 Strains and plasmids used in this work**

| Strain or plasmid                                     | Characteristics                                                                                                                   | Source or Reference |
|-------------------------------------------------------|-----------------------------------------------------------------------------------------------------------------------------------|---------------------|
| <b>Strains</b>                                        |                                                                                                                                   |                     |
| <i>S. erythraea</i> NRRL2338                          | Used as parental strain, wild type                                                                                                | DSM 40517           |
| <i>E. coli</i> DH5 $\alpha$                           | <i>E. coli</i> DH5 $\alpha$ F- $\phi$ 80d lacZ $\Delta$ M (lacZ YA -argF) U169 deoR                                               | Transgen Biotech    |
| <i>E. coli</i> BL21(DE3)                              | F'ompTr- Bm-B (DE3)                                                                                                               | Transgen Biotech    |
| <i>E. coli</i> BL21(DE3)- <i>bldD</i>                 | The strain for expression of BldD                                                                                                 | This study          |
| <i>E. coli</i> BL21(DE3)- <i>bldD</i> <sup>K11Q</sup> | The strain for expression of BldD <sup>K11Q</sup>                                                                                 | This study          |
| <i>E. coli</i> BL21(DE3)- <i>bldD</i> <sup>K11R</sup> | The strain for expression of BldD <sup>K11R</sup>                                                                                 | This study          |
| <i>S. erythraea</i> <i>OblDD</i>                      | The strain for over-expression of <i>bldD</i> , NRRL2338 integrated with pIB139- <i>bldD</i>                                      | This study          |
| <i>S. erythraea</i> <i>OblDD</i> <sup>K11Q</sup>      | The strain for over-expression of <i>bldD</i> <sup>K11Q</sup> , NRRL2338 integrated with pIB139- <i>bldD</i> <sup>K11Q</sup>      | This study          |
| <i>S. erythraea</i> <i>OblDD</i> <sup>K11R</sup>      | The strain for over-expression of <i>bldD</i> <sup>K11R</sup> , NRRL2338 integrated with pIB139- <i>bldD</i> <sup>K11R</sup>      | This study          |
| <b>plasmid</b>                                        |                                                                                                                                   |                     |
| pET28a(+)                                             | vector with T7-RNA polymerase-based promoter for expression in <i>E. coli</i> BL21(DE3), hexahistidine tag with thrombin cleavage | Thermo Scientific   |
| pET- <i>bldD</i>                                      | pET28a(+) with <i>bldD</i> inserted in NdeI and HindIII                                                                           | This study          |
| pET- <i>bldD</i> <sup>K11Q</sup>                      | pET28a(+) with <i>bldD</i> <sup>K11Q</sup>                                                                                        | This study          |
| pET- <i>bldD</i> <sup>K11R</sup>                      | pET28a(+) with <i>bldD</i> <sup>K11R</sup>                                                                                        | This study          |
| pIB139                                                | pSET152 with integrase of phiC31 and PermE, the strong promoter of <i>Streptomyces</i>                                            | (25)                |
| pIB139- <i>bldD</i>                                   | pIB139 with <i>bldD</i> gene inserted into NdeI and XbaI                                                                          | This study          |
| pIB139- <i>bldD</i> <sup>K11Q</sup>                   | pIB139 with <i>bldD</i> <sup>K11Q</sup>                                                                                           | This study          |
| pIB139- <i>bldD</i> <sup>K11R</sup>                   | pIB139 with <i>bldD</i> <sup>K11R</sup>                                                                                           | This study          |

**Table S3 The oligonucleotides used in the study**

| Oligonucleotides                                                                   | Sequence (5' to 3')                            |
|------------------------------------------------------------------------------------|------------------------------------------------|
| <b>Primers for overproduction of BldD protein</b>                                  |                                                |
| pET- <i>bldDF</i>                                                                  | GTCGCGGATCCGAATTCATGGGCGACTACGCCAAG            |
| pET- <i>bldDR</i>                                                                  | GGTGCTCGAGTGC GGCCGAAGCTTTCCTCCTCCCGGGCCG      |
| <b>Primers for the construction of the <i>S. erythraea</i> <i>ObldD</i> strain</b> |                                                |
| pIB- <i>bldDF</i>                                                                  | GCCGGTTGGTAGGATCCACATATGCATCATCATCATCACAGCAGCG |
| pIB- <i>bldDR</i>                                                                  | CGCGCGGGCCGCGGATCCTCTAGAAGCTTCTTCGGGCTTTGTTAG  |
| M13F                                                                               | GTGCTGCAAGGCGATTAAGTT                          |
| M13R                                                                               | TTATGCTTCCGGCTCGTATGT                          |
| <b>The primers used in Site-Directed Mutagenesis of BldD</b>                       |                                                |
| K11R F                                                                             | GCGGCAGGCTCCGCGC                               |
| K11R R                                                                             | CTGCCGCCAGCGCCT                                |
| K11Q F                                                                             | GCGGCCAGCTCCGCGC                               |
| K11Q R                                                                             | GGCCGCCAGCGCCTT                                |
| <b>Primers for PCR amplification of EMSAs probe with biotin labeling</b>           |                                                |
| <i>bldD</i> _F                                                                     | AGCCAGTGGCGATAAGTCCCGACGGCTGTCGGC              |
| <i>bldD</i> _R                                                                     | AGCCAGTGGCGATAAGCCGTTTCATTCGCCCCGTC            |
| <b>Primers for real-time RT-PCR</b>                                                |                                                |
| SACE_8101-F                                                                        | GTTGCGATGCCGTGAGGT                             |
| SACE_8101-R                                                                        | CGGGTGTACCGACTTTCA                             |
| <i>eryBIV</i> -F                                                                   | GCAGCCGCAGGATCACGC                             |
| <i>eryBIV</i> -R                                                                   | GCCGCCCGTGTGCTCTA                              |
| <i>eryAI</i> -F                                                                    | CCGCTGATGCCGAACGAC                             |
| <i>eryAI</i> -R                                                                    | CACCCTCCCCGCACTCTG                             |
| <i>ermE</i> -F                                                                     | CCTCCAGGCACCAGTCCAC                            |
| <i>ermE</i> -R                                                                     | AGTCGTTGCGGGAGAAGCT                            |
| <i>eryK</i> -F                                                                     | CCGATGGACCACGAGCAGTT                           |
| <i>eryK</i> -R                                                                     | AAGGCGGGAGATCAGGTCGT                           |
| <i>whiG</i> -F                                                                     | AGTTGCAGATGACCAGCGTG                           |
| <i>whiG</i> -R                                                                     | GAGACGTTCTACAGCCTCGG                           |
| <i>bldN</i> -F                                                                     | CTCTACGACGAGTACTCCCAGG                         |
| <i>bldN</i> -R                                                                     | GTTCTTGCGGATGGTATGAAC                          |
| <i>bldM</i> -F                                                                     | GACTTGTCTCGGCCACC                              |
| <i>bldM</i> -R                                                                     | CTCGGTCAGCTGCACACC                             |

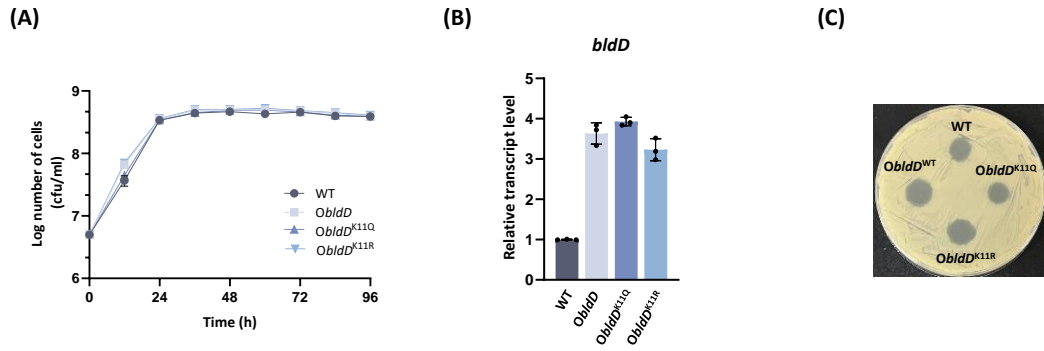

**Figure S1 K11 acetylation inhibits antibiotic production.** (A) Growth curves of *S. erythraea* WT, *ObldD*, *ObldD*<sup>K11Q</sup>, and *ObldD*<sup>K11R</sup> strains grown in TSB medium. (B) The transcription level of *bldD* gene in *S. erythraea* WT, *ObldD*, *ObldD*<sup>K11Q</sup>, and *ObldD*<sup>K11R</sup> strains grown in TSB medium till the middle exponential phase. Fold change represented the expression level compared to WT strain. Error bars show the SDs of three independent experiments. (C) The antibiotic production of *S. erythraea* WT, *ObldD*, *ObldD*<sup>K11Q</sup>, and *ObldD*<sup>K11R</sup> strains grown in TSB medium determined by bioassays.

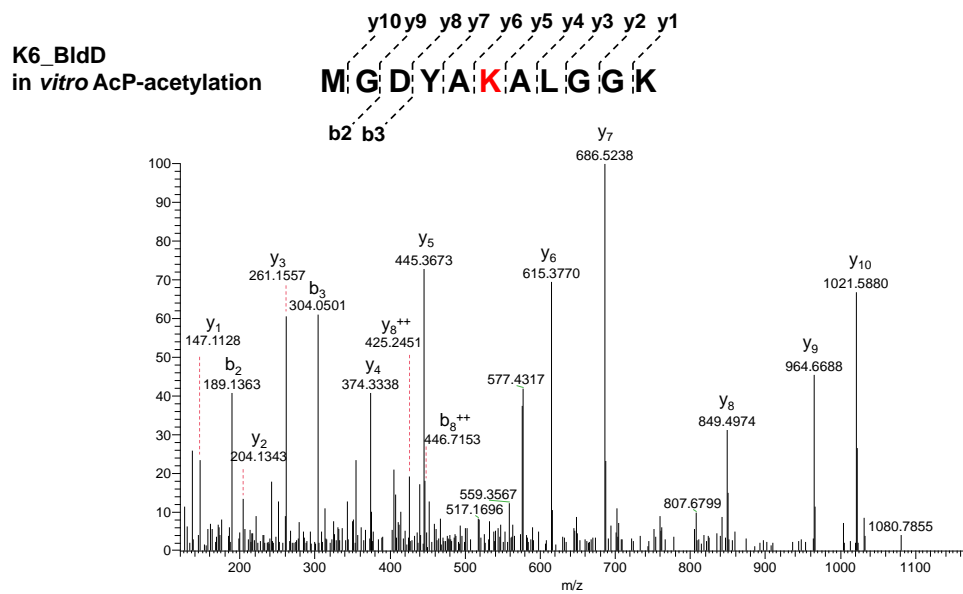

**Figure S2** MS/MS spectra for the identification of AcP- acetylated K6 by LC/MS/MS analysis.

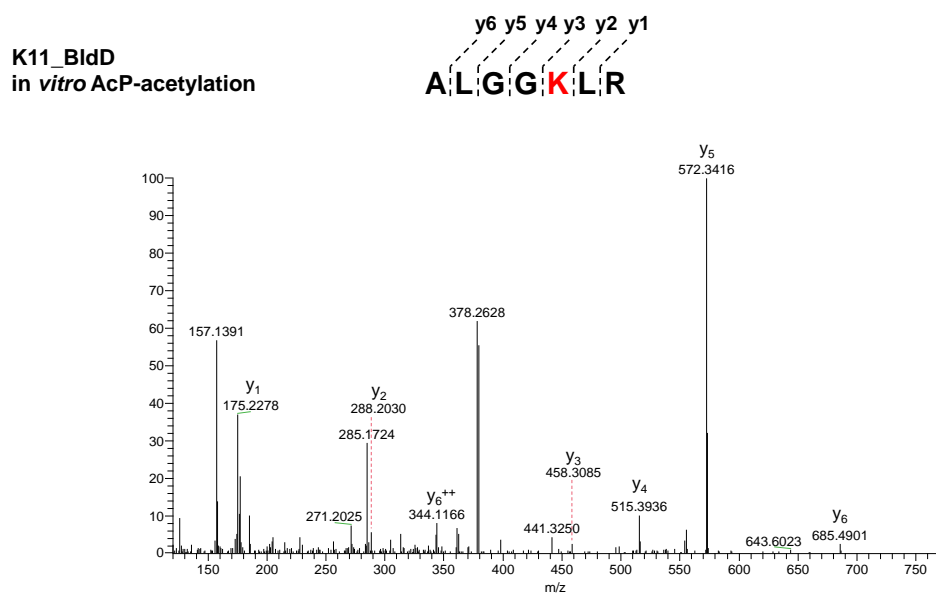

**Figure S3** MS/MS spectra for the identification of AcP- acetylated K11 by LC/MS/MS analysis.

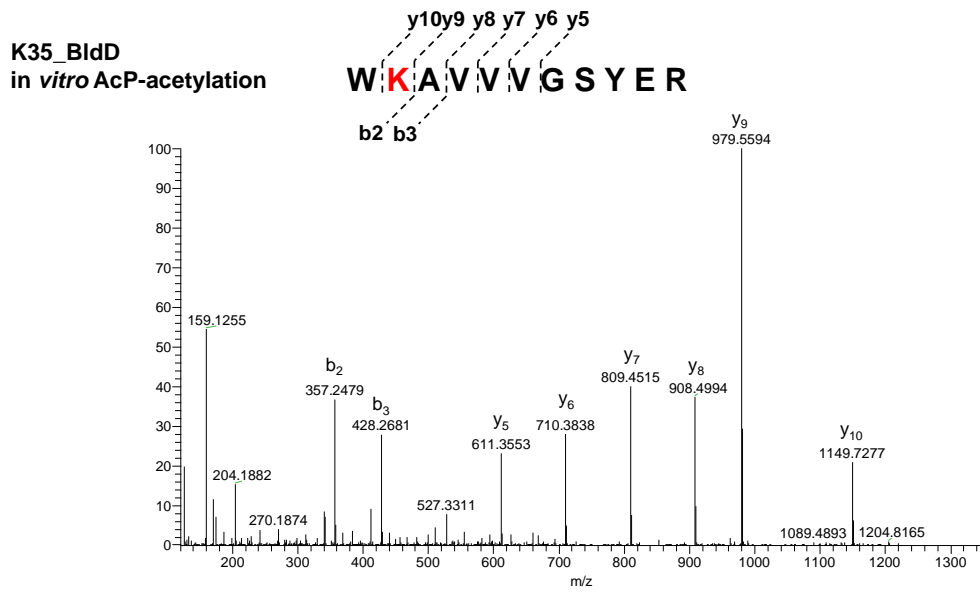

**Figure S4** MS/MS spectra for the identification of AcP- acetylated K35 by LC/MS/MS analysis.

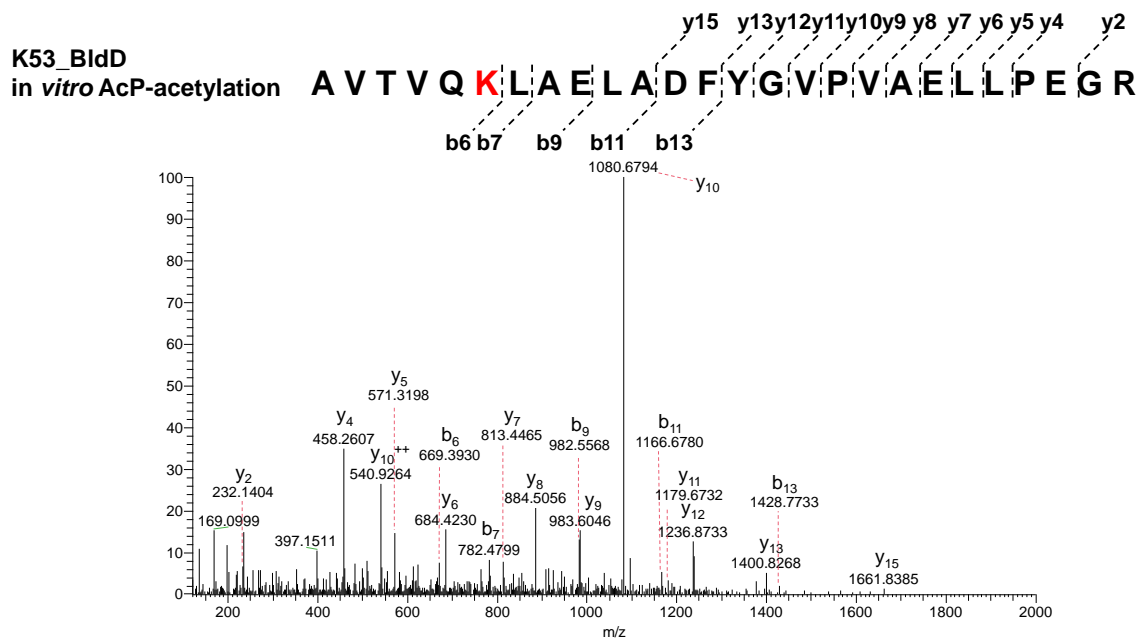

**Figure S5** MS/MS spectra for the identification of AcP- acetylated K53 by LC/MS/MS analysis.

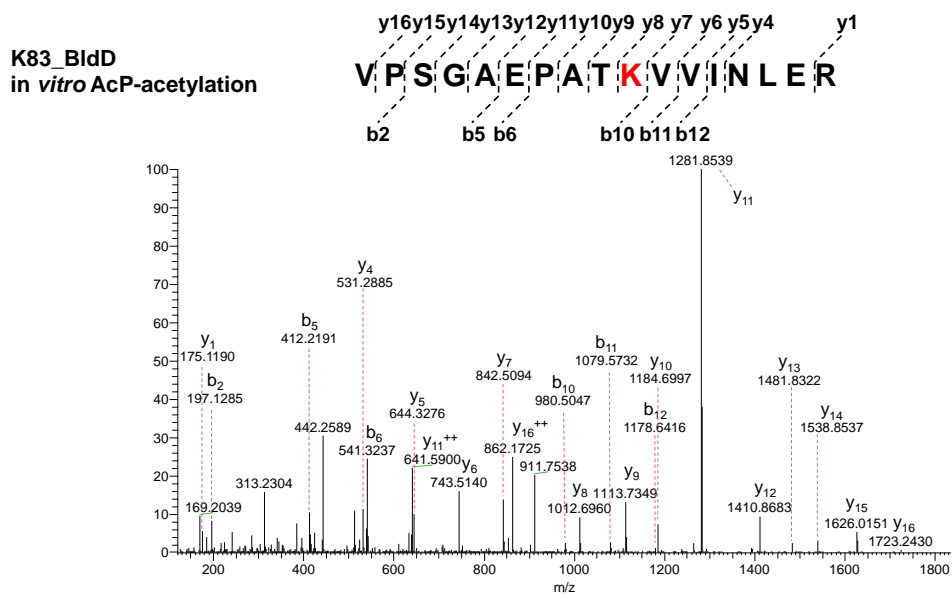

**Figure S6** MS/MS spectra for the identification of AcP- acetylated K83 by LC/MS/MS analysis.

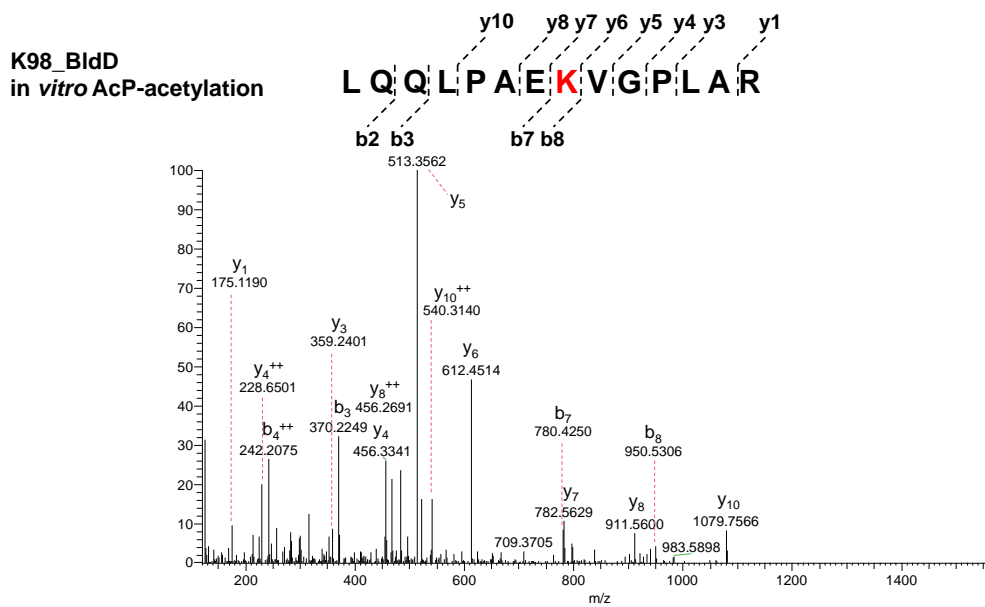

**Figure S7** MS/MS spectra for the identification of AcP- acetylated K98 by LC/MS/MS analysis.

K119\_BldD  
in vitro AcP-acetylation

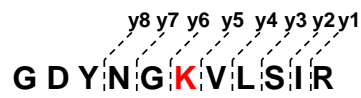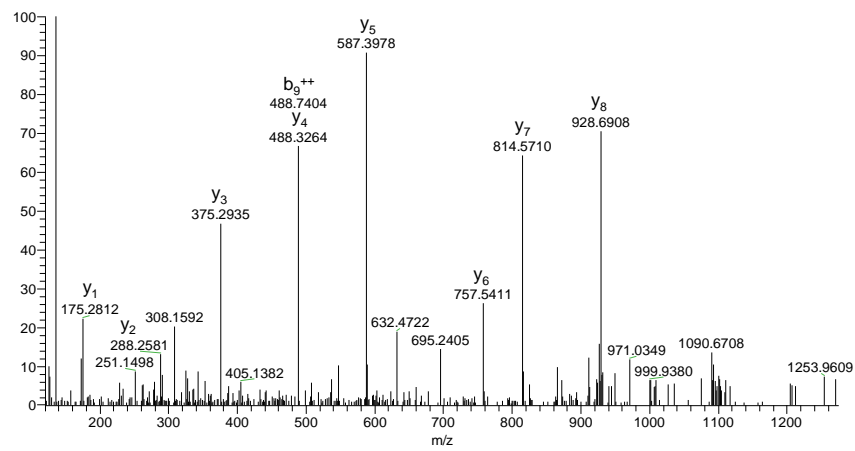

Figure S8 MS/MS spectra for the identification of AcP- acetylated K119 by LC/MS/MS analysis.

K35\_BldD  
in vitro AcuA-acetylation

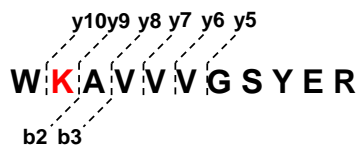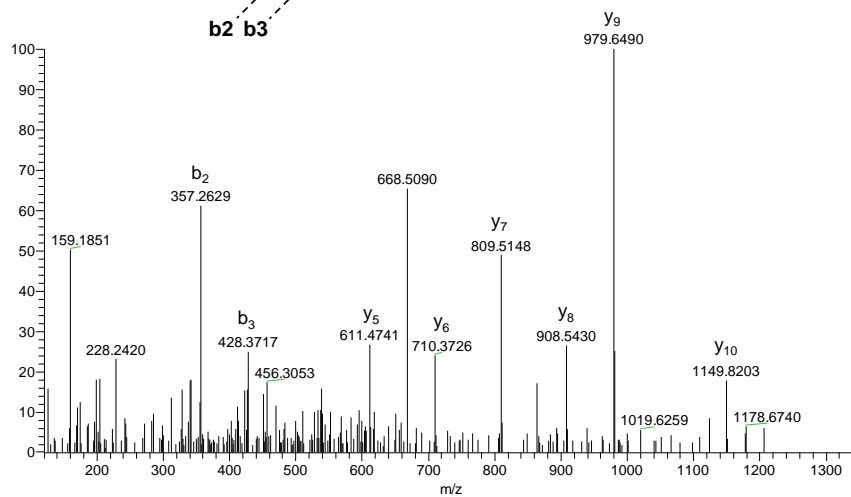

Figure S9 MS/MS spectra for the identification of AcuA- acetylated K35 by LC/MS/MS analysis.



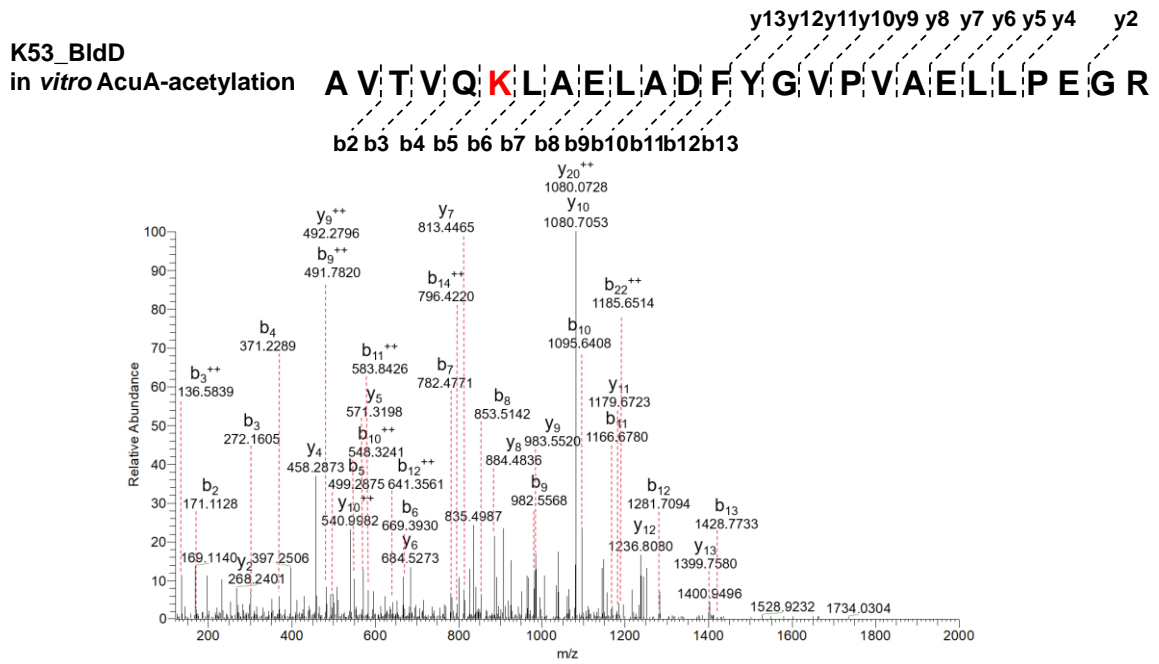

Figure S10 MS/MS spectra for the identification of AcuA- acetylated K53 by LC/MS/MS analysis.

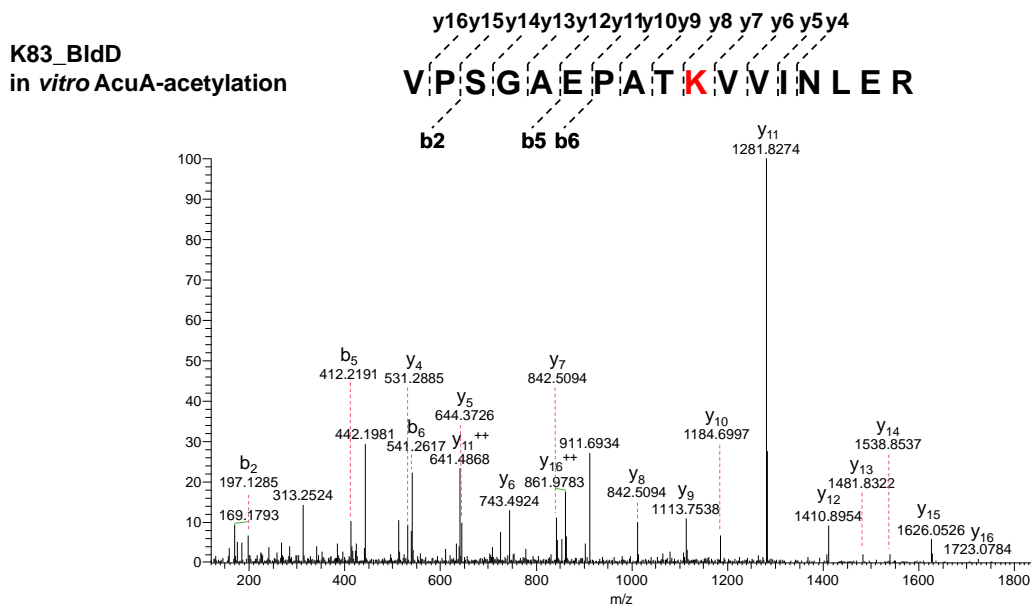

Figure S11 MS/MS spectra for the identification of AcuA- acetylated K83 by LC/MS/MS analysis.

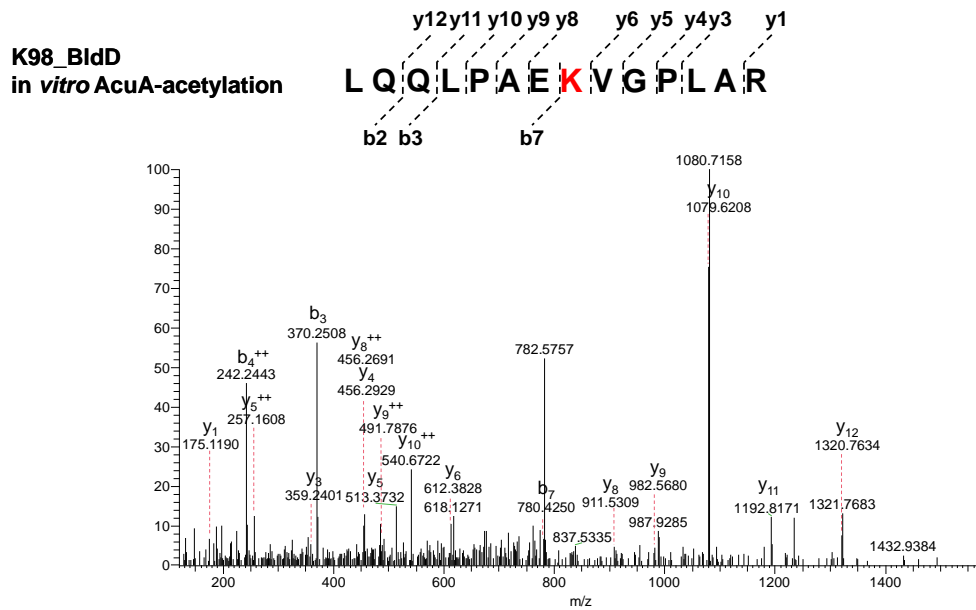

Figure S12 MS/MS spectra for the identification of AcuA- acetylated K98 by LC/MS/MS analysis.

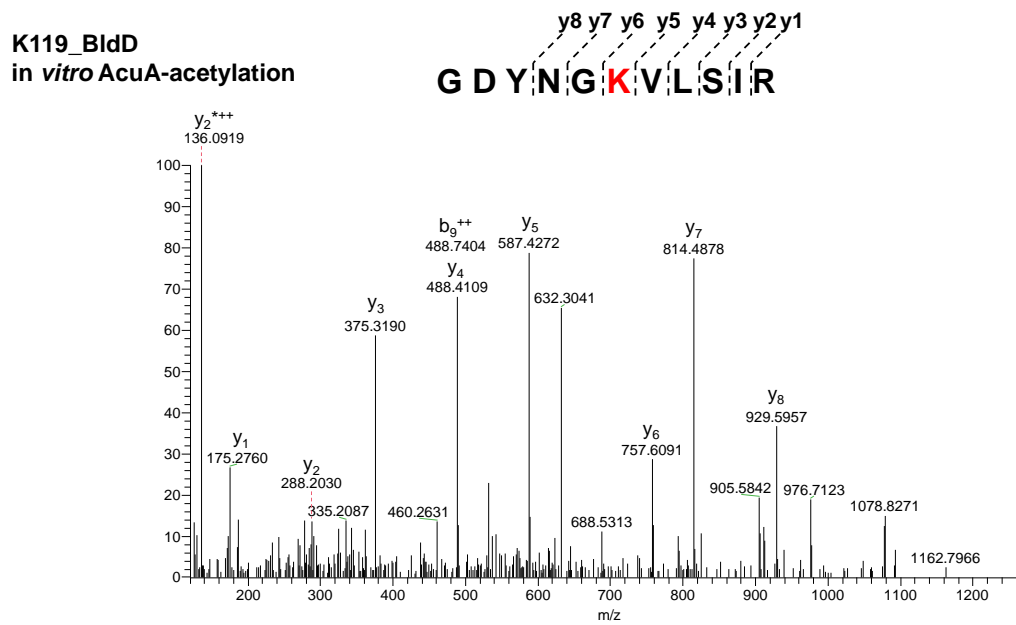

Figure S13 MS/MS spectra for the identification of AcuA- acetylated K119 by LC/MS/MS analysis.

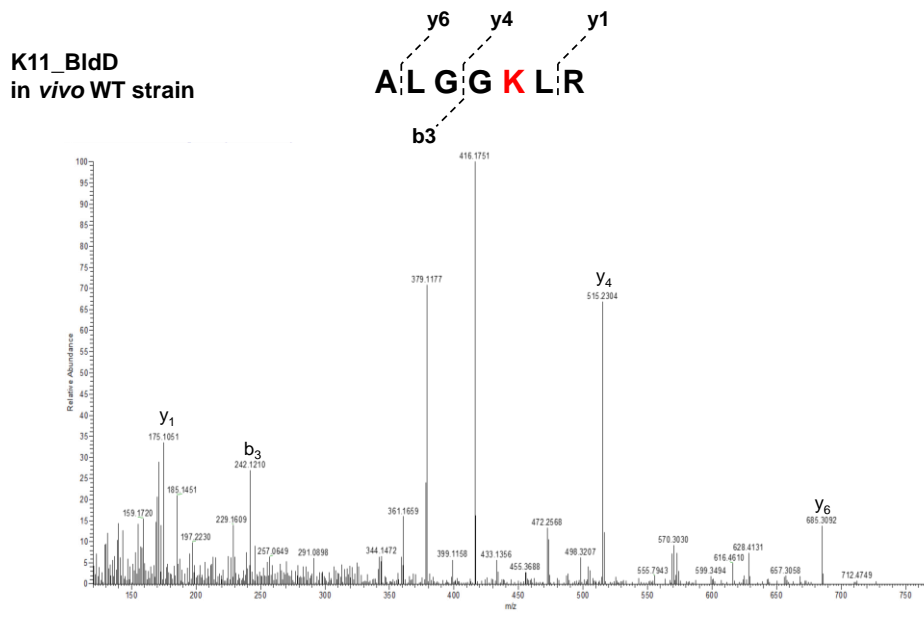

**Figure S14** MS/MS spectra for the identification of K11 *in vivo* by LC/MS/MS analysis.

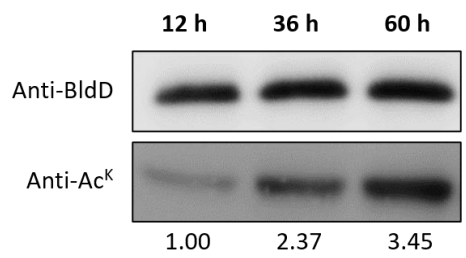

**Figure S15** BldD acetylation level at different growth stage. Acetylation level of BldD of the *S. erythraea* WT strain under N<sup>-</sup> conditions at the indicated time. Each lane was loaded with equal amount of BldD protein. The band intensities were quantified by densitometry using ImageJ software.
